# Supplementary material
Source: Springer Nature journal article supplement (https://www.springermedizin.de/resource/supplementary/12889_2013_6431_MOESM2_ESM.pdf/9497882)

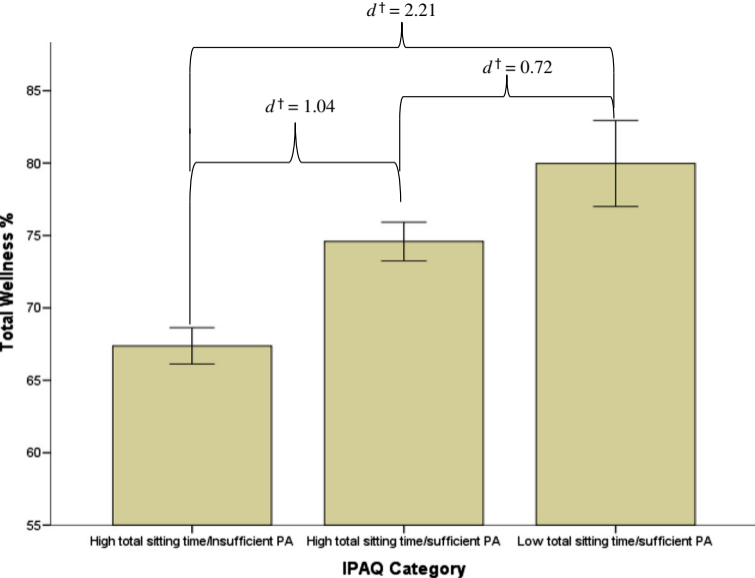

Error Bars: 95% CI

Cohen's  $d^+$ , small (0.2–0.5), moderate (0.5–0.8), and large (>0.8)

Supplement: MOESM2 [file 9497882]
